# Supplementary material for: Reversible silencing of lumbar spinal interneurons unmasks a task-specific network for securing hindlimb alternation
Source: PubMed Central journal article supplement (PMC5719045; doi:10.1038/s41467-017-02033-x), 2017-12-06
Supplement: 41467_2017_2033_MOESM1_ESM.pdf [file 41467_2017_2033_MOESM1_ESM.pdf]

1 **Supplementary Figure 1.**

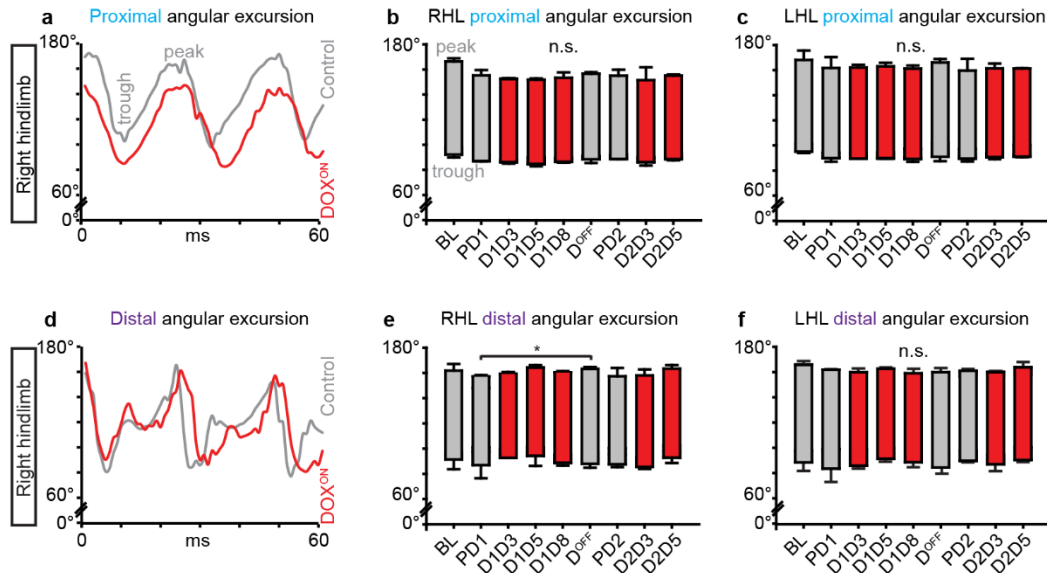

2

3 **Supplementary Figure 1. Silencing L2-L5 interneurons does not affect hindlimb range-of-**

4 **motion.** Representative traces of the proximal (a) and distal (d) hindlimb angle excursions (from peak to

5 trough) at Control (gray) and DOX<sup>ON</sup> time points (red), respectively (right hindlimb shown). Silencing

6 L2-L5 interneurons did not affect the peak-to-trough excursion of the right (b) or left (c)

7 proximal hindlimb angle. Similarly, the conditional silencing did not alter the excursion of the

8 distal hindlimb angle for the right (e) or left hindlimb (f), respectively. There was a slight, but

9 significant increase in the angular excursion at DOX<sup>OFF</sup> as compared to Pre-DOX1 (\*p<0.05;

10 mixed model ANOVA and Bonferroni *post hoc* t-test). Quantitative data are the mean ± S.D.

11 (N=6).

12 **Supplementary Figure 2.**

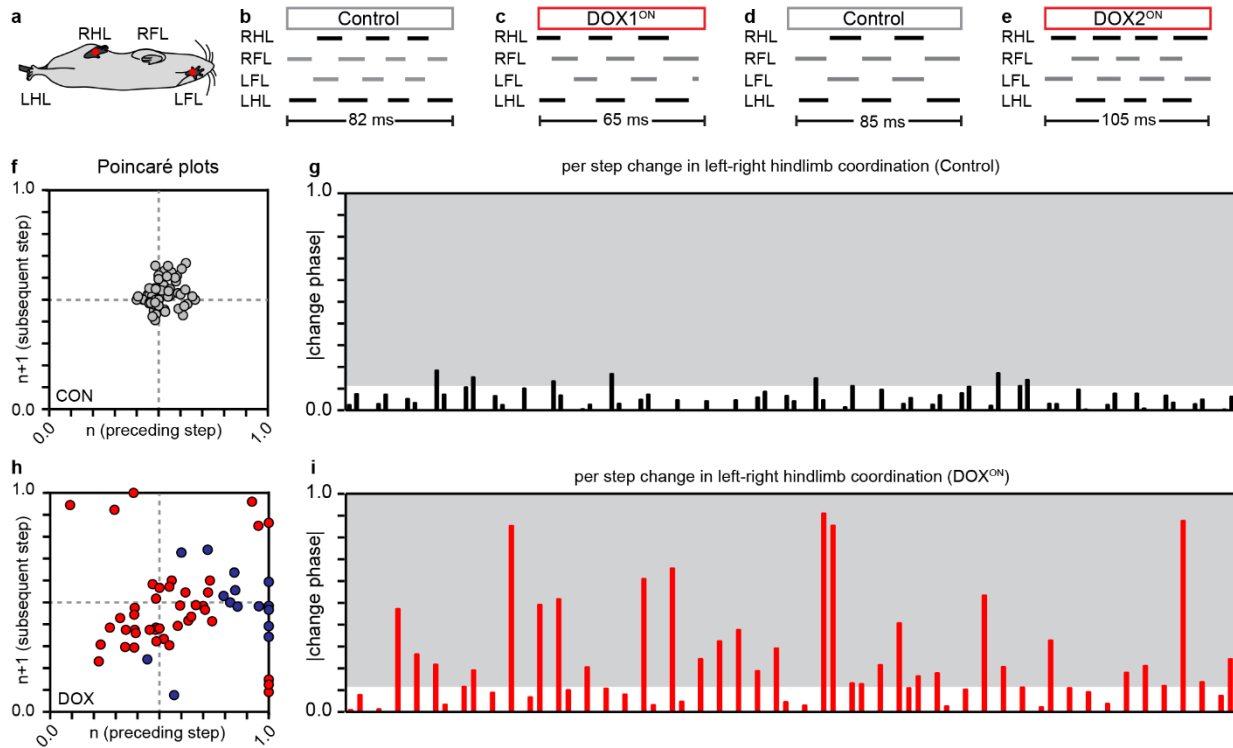

13

14 **Supplementary Figure 2. Silencing L2-L5 interneurons disrupts left-right hindlimb coordination on**

15 **a step-by-step basis.** (a) Ventral recordings of paw contacts were used to generate swing-stance graphs  
 16 and gait analyses (LFL: left forelimb; RFL: right forelimb; LHL: left hindlimb; RHL: right hindlimb). (b-  
 17 e) Swing-stance graphs from Control and DOX<sup>ON</sup> time points, respectively, with the duration of the  
 18 overall locomotor bout shown below. Each line denotes paw contact with the ground (stance phase) while  
 19 the intervening space between each line represents the swing phase, when the paw is in the air. A subset  
 20 of the data shown in Figure 5f was selected for expanded graphical representation of per-step changes in  
 21 left-right hindlimb coordination (g,i, expanded for clarity; shaded region denotes changes beyond control  
 22 variability) as well as Poincaré plot generation (f,h), which illustrate left-right hindlimb coordination  
 23 across successive step cycles (x-axis, preceding step  $n$ ; y-axis, subsequent step  $n+1$ ).  $N=95$  and  $96$  per-  
 24 step changes were sampled from Control and DOX<sup>ON</sup> time points, respectively.

25 **Supplementary Figure 3.**

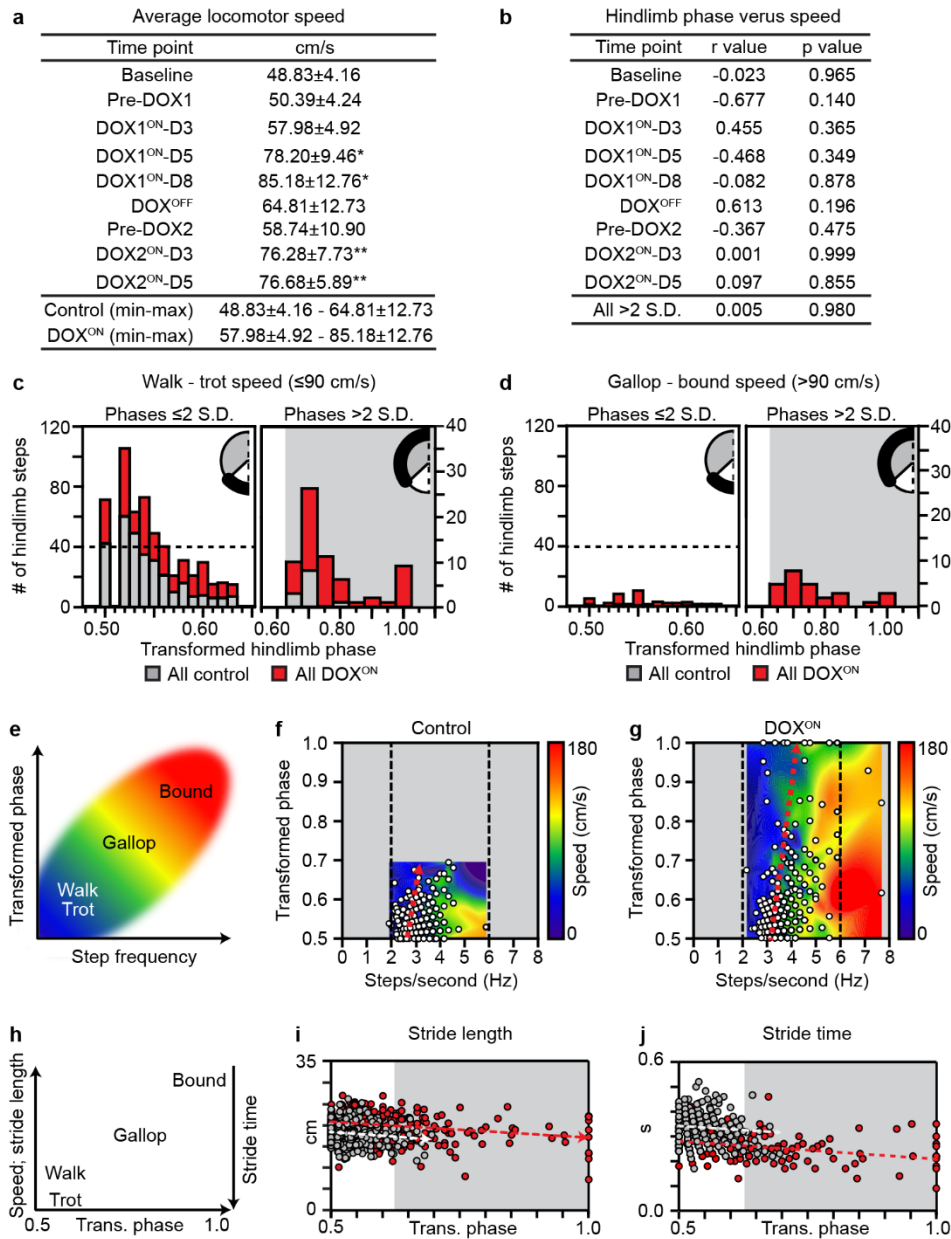

26 **Supplementary Figure 3. Silencing-induced changes in hindlimb coordination did not**

27 **correlate with speed or gait-related indices. (a)** Overall locomotor speed across time points (group

28 mean±S.D.). The speed was significantly enhanced during DOX1<sup>ON</sup>-D5 and DOX1<sup>ON</sup>-D8 as compared to

29 Pre-DOX1 (\*  $p \leq 0.5$ , repeated measures ANOVA; Tukey's *post hoc* honest significant difference t-test) as

30 well as during DOX2<sup>ON</sup>-D3 and DOX2<sup>ON</sup>-D5 as compared to Pre-DOX2 (\*\* $p \leq 0.01$ ). No significant

31 different differences were detected when comparing to Baseline and DOX<sup>OFF</sup>. The overall speed range

32 (minimum-maximum) for the group at Control and DOX<sup>ON</sup> time points, respectively, is listed below. **(b)**  
33 Summary of Pearson correlations between averaged phase vs speed, per time point. **(c)** Left  
34 panel shows the frequency distribution of hindlimb coordination values within the control  
35 variability (right inset; 0.50-0.63) that occurred at  $\leq 90$  centimeters/second, a locomotor velocity  
36 where the limbs typically alternate in a walk or trot gait. Right panel shows the frequency at  
37 which phases  $> 0.63$ , including synchrony at 1.0, occur at a speed where alternation usually  
38 prevails (shaded region denotes phases beyond control variability). **(d)** Frequency distribution of  
39 hindlimb phases at gallop-to-bound speeds ( $> 90$  cm/sec). **(e,h)** Inter-relationship between various  
40 gait indices. **(f,g)** Step frequency-phase relationship (white circles) mapped onto speed contour  
41 plot (see methods for detail). Silencing-induced changes in hindlimb coordination did not  
42 correlate with increased step frequency. **(i)** Similarly, changes to hindlimb coordination did not  
43 correlate with increased stride length (Control,  $r_S = -0.068$  in dashed white line; DOX<sup>ON</sup>,  $r_S = -$   
44  $0.125$  in dashed red line; Spearman Rank correlation) or decreased stride time **(j)**, Control  $r_S = -$   
45  $0.036$ ; DOX<sup>ON</sup>  $r_S = -0.338$ ).

46 **Supplementary Figure 4.**

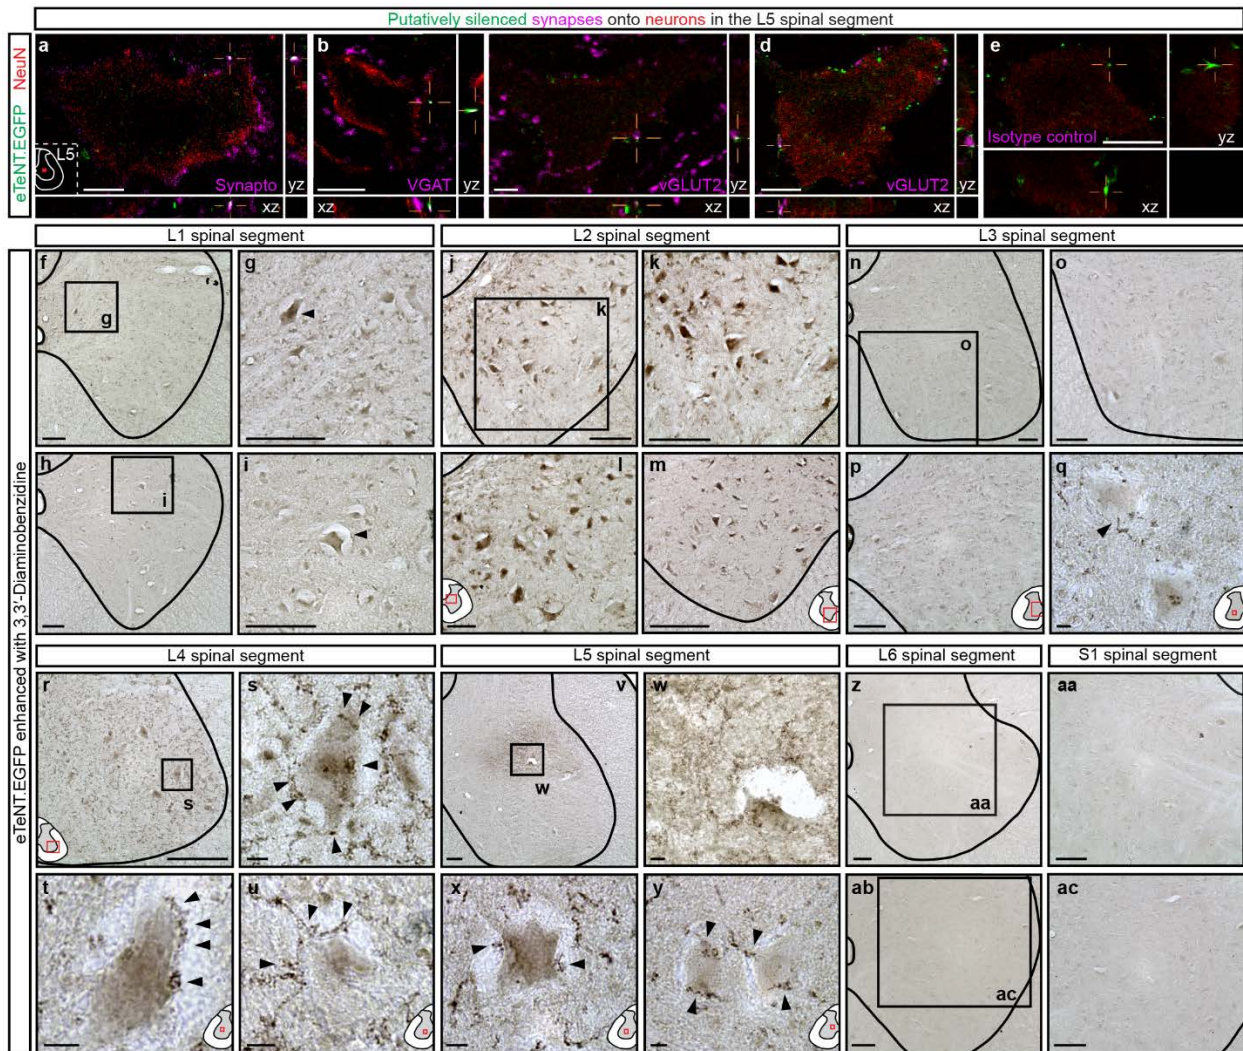

47  
 48 **Supplementary Figure 4. Immunohistochemical interrogation of conditionally silenced L2-L5**  
 49 **interneurons.** Cross-sections throughout the z-stack confirming co-localization of eTeNT.EGFP with  
 50 synaptophysin (**a**, synapto), vesicular GABA transporter (**b**, VGAT), or vesicular glutamate transporter 2  
 51 (**c-d**) in the xz-yz planes (white signal denoted in cross-hairs). (**e**) Isotype control. (**f-ac**) eTeNT.EGFP  
 52 immunoreactivity assessed throughout the lumbosacral enlargement using 3,3'-Diaminobenzidine  
 53 enhancement. (**f-i**) Few double-infected neurons were detected at L1 (black arrowheads). (**j-m**) Numerous  
 54 double-infected neurons were detected throughout the intermediate gray matter at spinal L2 (black  
 55 arrowheads). (**n-q**) Sparse, terminal-like structures were detected at L3 (**q**, arrowhead). No double-  
 56 infected neurons were detected. (**r-u**) Terminal-like structures were detected throughout intermediate and

57 ventral gray matter at spinal L4 through L5 (arrowheads). (**v-y**) Cross-sections distal to lentiviral vector  
58 injection. (**z-ac**) No eTeNT.EGFP immunoreactivity was detected at L6-S1. Images acquired at 10, 20,  
59 and 40x magnifications. Scale bar=10  $\mu\text{m}$  (**a-e, q, s-u, w-x, y**) or 100  $\mu\text{m}$  (**f-p, r, v, z-aa, ab-ac**).

60 **Supplementary Figure 5.**

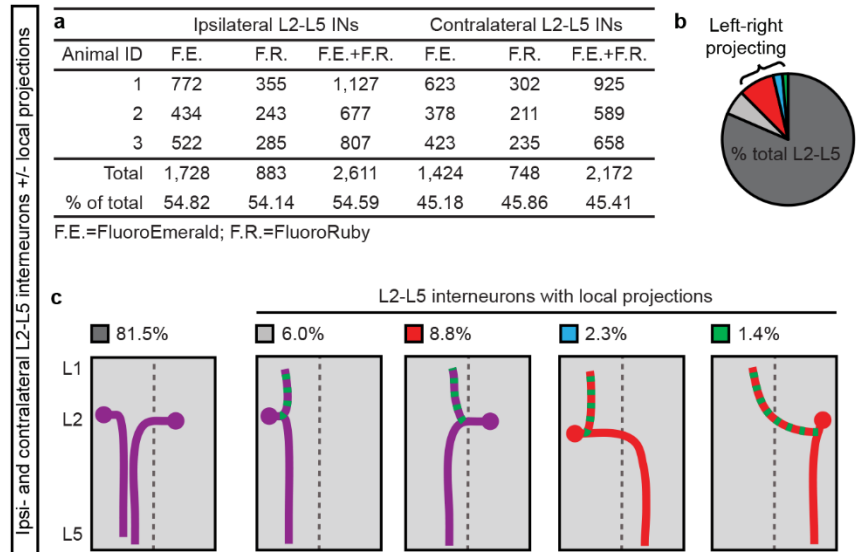

61 **Supplementary Figure 5. The majority of L2-L5 interneurons lack local projections in the**  
 62 **rostral lumbar spinal cord. (a)** Data shown are absolute cell counts and percent total of L2  
 63 interneurons with ipsilateral or contralateral projections to spinal L5 following bilateral  
 64 injections of FluoroEmerald (F.E.) and FluoroRuby (F.R.). No significant difference was found  
 65 between ipsi- and contralateral L2-L5 interneurons (total ipsilateral vs total contralateral:  $p > 0.4$ ;  
 66 independent t-test between means of equal variance). **(b,c)** Summary of the L2-L5 projection  
 67 patterns observed following triple tracer (CTB) injections. Of the total L2-L5 interneurons  
 68 labeled at L2 following bilateral L5 injections, approximately 80% did not have local projections  
 69 within one (rostral) segment of their cell body (dark gray,  $81.49 \pm 2.36\%$ ). Almost 20% of the L2-  
 70 L5 interneurons had projections within one segment of their cell body ( $18.51 \pm 2.36\%$ ). Of this  
 71 proportion, approximately 12.5% had direct projections between the left and right sides of the  
 72 spinal cord **(c, red, blue, and green)**. Data shown represent the proportions of projection patterns  
 73 observed relative to percent total L2-L5 interneurons that were labeled.

74

75 **Supplementary Figure 6.**

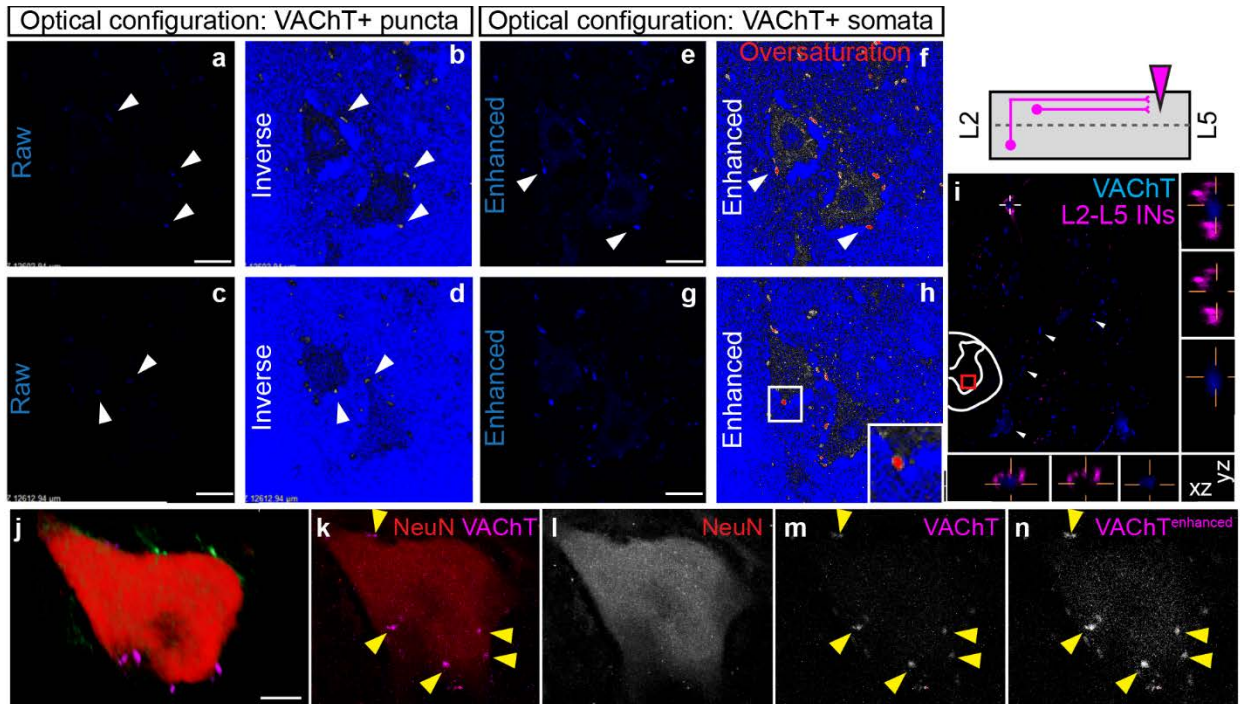

76

77 **Supplementary Figure 6. Putatively silenced synapses onto caudal lumbar motor neurons.**

78 (a-d) Optimal optical configurations for VACHT immunoreactivity in pre-synaptic puncta vs  
 79 motor neuron somata (not shown: CTB-labeled motor neurons from hindlimb intramuscular  
 80 injections; see “ghost” neurons in b and d). Images shown in (a-b) and (c-d) reflect VACHT-  
 81 positive immunoreactivity with optimal confocal configurations set for the pre-synaptic puncta.  
 82 Left panels reflect raw VACHT signal (blue). Right panels reflect the inverted image to show  
 83 saturation of the fluorophore based on image acquisition settings. Ideal optical configurations for  
 84 fluorophore detection yield gray-white signal (white arrowheads). Images shown in (e-f) and (g-  
 85 h) reflect VACHT-positive immunoreactivity with optical configurations set for the somata. Note  
 86 that when VACHT signal is detected in the somata, the pre-synaptic puncta become oversaturated  
 87 (red signal, white arrowheads). Images shown reflect one optical slice (0.4  $\mu$ m) through a 20-30  
 88 slice z-stack captured at 100x (scale bar=20  $\mu$ m). A subset of L2-L5 interneurons showed



89 somatic co-localization with VAcHT (i). (j-n) *Post hoc* image modifications reveal VAcHT-  
90 positive immunoreactivity in putative NeuN-positive motor neuron shown in Figure 7e.

91

92

93 **Supplementary Table 1.**

|                              | Stance time   |              | Swing time    |              | Stride time   |              | Stride length |              |
|------------------------------|---------------|--------------|---------------|--------------|---------------|--------------|---------------|--------------|
|                              | r value       | p value      | r value       | p value      | r value       | p value      | r value       | p value      |
| Baseline                     | -0.023        | 0.965        | 0.574         | 0.234        | 0.508         | 0.304        | 0.648         | 0.164        |
| Pre-DOX1                     | -0.677        | 0.140        | 0.935         | 0.054        | 0.732         | 0.098        | -0.505        | 0.307        |
| DOX1 <sup>ON</sup> -D3       | 0.455         | 0.365        | -0.640        | 0.171        | -0.699        | 0.123        | -0.169        | 0.750        |
| DOX1 <sup>ON</sup> -D5       | -0.468        | 0.349        | -0.860        | 0.252        | -0.354        | 0.492        | -0.865        | 0.234        |
| DOX1 <sup>ON</sup> -D8       | -0.082        | 0.878        | -0.422        | 0.404        | -0.129        | 0.808        | -0.306        | 0.555        |
| DOX <sup>OFF</sup>           | 0.613         | 0.196        | -0.326        | 0.529        | -0.668        | 0.147        | 0.389         | 0.446        |
| Pre-DOX2                     | -0.367        | 0.475        | 0.273         | 0.601        | 0.630         | 0.180        | 0.010         | 0.985        |
| DOX2 <sup>ON</sup> -D3       | 0.001         | 0.999        | -0.528        | 0.282        | -0.768        | 0.074        | -0.720        | 0.106        |
| DOX2 <sup>ON</sup> -D5       | 0.097         | 0.855        | -0.738        | 0.094        | -0.727        | 0.102        | -0.694        | 0.126        |
| <b>All phases &gt;2 S.D.</b> | <b>-0.031</b> | <b>0.862</b> | <b>-0.247</b> | <b>0.158</b> | <b>-0.091</b> | <b>0.609</b> | <b>-0.100</b> | <b>0.573</b> |

94 **Supplementary Table 1. Disruption in hindlimb phase did not correlate with speed-related**

95 **gait parameters.** Time point comparisons showed hindlimb phase did not significantly correlate

96 with speed-associated gait measures such as stance, swing, and stride time as well as stride

97 distance. All phase values >2 S.D. also did not significantly correlate with speed-related gait

98 measures (averaged data; Pearson correlation with the Bonferroni correction for multiple

99 comparisons to reduce the likelihood of Type I errors).

100 **Supplementary Table 2.**

|                                  | Stance time               |         | Swing time                |         | Stride time               |         | Stride length             |              |
|----------------------------------|---------------------------|---------|---------------------------|---------|---------------------------|---------|---------------------------|--------------|
|                                  | $r_{y(2\cdot1)}$<br>value | p value | $r_{y(2\cdot1)}$<br>value | p value | $r_{y(2\cdot1)}$<br>value | p value | $r_{y(2\cdot1)}$<br>value | p value      |
| Baseline                         | 0.663                     | 0.223   | 0.766                     | 0.131   | 0.862                     | 0.060   | 0.842                     | 0.073        |
| Pre-DOX1                         | -0.414                    | 0.323   | 0.645                     | 0.051   | 0.306                     | 0.487   | 0.246                     | 0.582        |
| DOX1 <sup>ON</sup> -D3           | 0.025                     | 0.965   | -0.544                    | 0.274   | -0.801                    | 0.342   | -0.753                    | 0.071        |
| DOX1 <sup>ON</sup> -D5           | -0.700                    | 0.110   | -0.809                    | 0.261   | -0.858                    | 0.054   | -0.867                    | <b>0.027</b> |
| DOX1 <sup>ON</sup> -D8           | -0.961                    | 0.072   | -0.463                    | 0.430   | -0.669                    | 0.215   | -0.809                    | 0.095        |
| DOX <sup>OFF</sup>               | -0.327                    | 0.488   | 0.014                     | 0.978   | -0.284                    | 0.553   | -0.267                    | 0.579        |
| Pre-DOX2                         | 0.633                     | 0.206   | 0.045                     | 0.939   | 0.599                     | 0.241   | 0.534                     | 0.312        |
| DOX2 <sup>ON</sup> -D3           | -0.966                    | 0.072   | -0.557                    | 0.329   | -0.852                    | 0.067   | -0.883                    | 0.423        |
| DOX2 <sup>ON</sup> -D5           | -0.915                    | 0.243   | -0.744                    | 0.146   | -0.840                    | 0.072   | -0.930                    | 0.180        |
| <b>All phases<br/>&gt;2 S.D.</b> | -0.039                    | 0.827   | -0.258                    | 0.148   | -0.140                    | 0.436   | -0.162                    | 0.368        |

101 **Supplementary Table 2. Hindlimb phase versus gait after controlling for speed.** Part  
102 correlations were performed, where the relationship between phase and gait (e.g., stance time)  
103 was measured after controlling for the effect of speed on that gait variable. Hindlimb phase  
104 significantly correlated with stride distance at DOX1<sup>ON</sup>-D5 only. This represents approximately  
105 2.8% of the total phase versus gait comparisons analyzed. All hindlimb phase values >2 S.D. did  
106 not significantly correlate with gait (averaged data; Part correlation with Bonferroni correction  
107 for multiple comparisons).

108 **Supplementary Table 3.**

|                           |                        | <b>p value</b>             | <b>U<sup>2</sup> value</b> |
|---------------------------|------------------------|----------------------------|----------------------------|
| Baseline vs               | Pre-DOX1               | p>0.50                     | -0.13369                   |
|                           | DOX1 <sup>ON</sup> -D3 | 0.05<p<0.10                | 0.16895                    |
|                           | DOX1 <sup>ON</sup> -D5 | <b>0.002&lt;p&lt;0.005</b> | 0.33339                    |
|                           | DOX1 <sup>ON</sup> -D8 | 0.10<p<0.20                | 0.13157                    |
|                           | All-DOX1 <sup>ON</sup> | <b>p&lt;0.001</b>          | 0.56176                    |
|                           | DOX <sup>OFF</sup>     | p>0.5                      | 0.07047                    |
| Pre-DOX1 vs               | DOX1 <sup>ON</sup> -D3 | 0.20<p<0.50                | 0.08912                    |
|                           | DOX1 <sup>ON</sup> -D5 | <b>0.01&lt;p&lt;0.02</b>   | 0.24507                    |
|                           | DOX1 <sup>ON</sup> -D8 | <b>0.02&lt;p&lt;0.05</b>   | 0.21514                    |
|                           | All-DOX1 <sup>ON</sup> | <b>p&lt;0.001</b>          | 0.59762                    |
|                           | DOX <sup>OFF</sup>     | p>0.50                     | 0.00498                    |
|                           | Pre-DOX2               | p>0.50                     | 0.01499                    |
| Baseline +<br>Pre-DOX1 vs | All-DOX1 <sup>ON</sup> | <b>p&lt;0.001</b>          | 0.59762                    |
| Pre-DOX2 vs               | DOX <sup>OFF</sup>     | p>0.50                     | 0.07400                    |
|                           | DOX2 <sup>ON</sup> -D3 | <b>0.002&lt;p&lt;0.005</b> | 0.31224                    |
|                           | DOX2 <sup>ON</sup> -D5 | <b>p&lt;0.001</b>          | 0.39267                    |
|                           | All-DOX2 <sup>ON</sup> | <b>p&lt;0.001</b>          | 1.29965                    |

109  
110 **Supplementary Table 3. Silencing L2-L5 interneurons functionally uncouples the left and**  
111 **right hindlimbs during overground stepping.** Using the non-parametric two-sample U<sup>2</sup> test,  
112 we tested the null hypothesis that the two samples (e.g. Baseline vs DOX1<sup>ON</sup>-D5) came from two  
113 populations with the same directions (in other words, degree of concentration or dispersion).  
114 This is an indication of whether the limbs are coupled (phases concentrated in same direction) or  
115 uncoupled (phases are dispersed). Silencing the L2-L5 interneurons significantly decreased the  
116 concentration of the phase values (reduced clustering at 0.5) and caused an increased dispersion  
117 throughout the coordination range. This suggests the hindlimbs became functionally uncoupled  
118 during overground locomotion. (Critical value of Watson’s U<sup>2</sup><sub>(0.05,∞,∞)</sub> = 0.1869; Appendix D,  
119 Table D.44)<sup>20</sup>.

120 **Supplementary Table 4.**

|                    |             |                        | <b>p value</b>           | <b>U<sup>2</sup> value</b> |
|--------------------|-------------|------------------------|--------------------------|----------------------------|
| Forelimb stepping  | Baseline vs | Pre-DOX1               | p>0.50                   | 0.01735                    |
|                    |             | DOX1 <sup>ON</sup> -D3 | p>0.50                   | 0.03821                    |
|                    |             | DOX1 <sup>ON</sup> -D5 | p>0.50                   | -0.03716                   |
|                    |             | DOX1 <sup>ON</sup> -D8 | p>0.50                   | 0.06999                    |
|                    |             | All-DOX1 <sup>ON</sup> | p>0.50                   | 0.00771                    |
|                    |             | DOX <sup>OFF</sup>     | p>0.50                   | 0.02585                    |
|                    | Pre-DOX1 vs | DOX1 <sup>ON</sup> -D3 | p>0.50                   | 0.02560                    |
|                    |             | DOX1 <sup>ON</sup> -D5 | p>0.50                   | 0.03907                    |
|                    |             | DOX1 <sup>ON</sup> -D8 | p>0.50                   | 0.02254                    |
|                    |             | All-DOX1 <sup>ON</sup> | p>0.50                   | 0.07072                    |
| DOX <sup>OFF</sup> |             | p>0.50                 | 0.03725                  |                            |
| Hindlimb swimming  | Baseline vs | Pre-DOX1               | p>0.50                   | 0.02585                    |
|                    |             | DOX1 <sup>ON</sup> -D3 | p>0.50                   | -0.96664                   |
|                    |             | DOX1 <sup>ON</sup> -D5 | p>0.50                   | -0.54443                   |
|                    |             | DOX1 <sup>ON</sup> -D8 | p>0.50                   | -0.48521                   |
|                    |             | All-DOX1 <sup>ON</sup> | p>0.50                   | -1.62815                   |
|                    |             | DOX <sup>OFF</sup>     | <b>0.02&lt;p&lt;0.05</b> | 0.20163                    |
|                    | Pre-DOX1 vs | DOX1 <sup>ON</sup> -D3 | p>0.50                   | -1.3616                    |
|                    |             | DOX1 <sup>ON</sup> -D5 | p>0.50                   | -0.79496                   |
|                    |             | DOX1 <sup>ON</sup> -D8 | p>0.50                   | -0.92183                   |
|                    |             | All-DOX1 <sup>ON</sup> | p>0.50                   | -2.69285                   |
| DOX <sup>OFF</sup> |             | p>0.50                 | 0.07581                  |                            |

121 **Supplementary Table 4. The conditional silencing of L2-L5 interneurons does not uncouple**

122 **the forelimbs during stepping nor the hindlimbs during swimming.** Following methods

123 described above, the null hypothesis was not rejected for time point comparisons of forelimb

124 stepping and hindlimb swimming. Silencing the L2-L5 interneurons did not change the

125 concentration of the phase values at 0.5. Note that in hindlimb swimming, Baseline was

126 significantly different from DOX<sup>OFF</sup> wherein the phases were more clustered at 0.5. (Critical

127 value of Watson's  $U^2_{(0.05, \infty, \infty)} = 0.1869$ ; Appendix D, Table D.44)<sup>20</sup>.
